# Supplementary figures and images for: A microfluidic device to investigate axon targeting by limited numbers of purified cortical projection neuron subtypes
Source: Royal Society of Chemistry journal article supplement (doi:10.1039/c2ib20019h), 2012-01-01

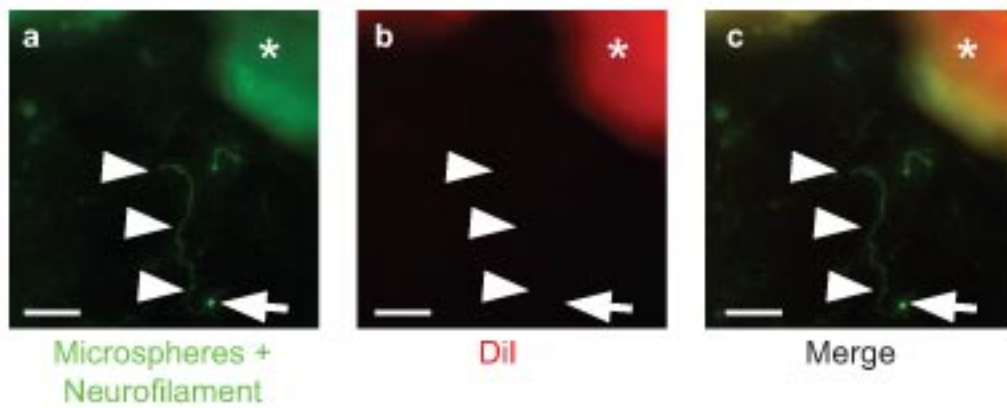

Supplement: c2ib20019h.pdf [file c2ib20019h.pdf]
